1           **Categorization and discrimination of human and non-human primate affective**  
2           **vocalizations: investigation of the frontal cortex activity through fNIRS.**

3  
4           Debracque, C.<sup>1\*</sup>, Ceravolo, L.<sup>1</sup>, Clay, Z.<sup>2</sup>, Grandjean, D.<sup>1±</sup>, & Gruber, T.<sup>1±</sup>

5  
6           <sup>1</sup> Department of Psychology and Educational Sciences and Swiss Center for Affective Sciences,  
7           University of Geneva, Geneva, Switzerland;

8           <sup>2</sup> Department of Psychology, Durham University, Durham, United Kingdom;

9           <sup>±</sup>*joint co-senior authors*

10  
11           \*Correspondence to: Coralie.Debracque@unige.ch; Swiss Center for Affective Sciences, Campus  
12           Biotech, CISA - University of Geneva, Chemin des Mines 9, 1202, Geneva, Switzerland; tel:  
13           +41223790889

31 **Abstract**

32 Many species, including humans and non-human primates, react differently to threatening or  
33 pleasant situations. Because of its adaptiveness, recognizing affective signals is likely to be  
34 reflected in a capability of modern humans to recognize other closely related species' call content.  
35 However, at both behavioural and neural levels, only few studies have used a comparative  
36 approach to understand affective decoding processes in humans, particularly with respect to  
37 affective vocalizations. Previous research in neuroscience about the recognition of human affective  
38 vocalizations has shown the critical involvement of temporal and frontal regions. In particular,  
39 frontal regions have been reported as crucial in the explicit decoding of vocal emotions especially  
40 in different task complexity such as discrimination or categorization. The aim of this study using  
41 functional Near Infrared Spectroscopy (fNIRS) was to specifically investigate the neural activity  
42 of the inferior frontal cortex *pars triangularis* (IFG<sub>tri</sub>) and the prefrontal cortex (PFC) underlying  
43 categorization (A versus B) and discrimination (A versus non-A) mechanisms of positive and  
44 negative affects in human, great apes (chimpanzee and bonobo), and monkey (rhesus macaque)  
45 vocalizations. We also analysed participants' behavioural responses and correlated them with the  
46 recorded frontal activations. While performing the tasks, fNIRS data revealed a clear distinction  
47 between the two frontal regions, with a general positive activation of IFG<sub>tri</sub> compared to a decrease  
48 of PFC activity. We also found a modulation of IFG<sub>tri</sub> and PFC activations depending on both the  
49 species considered and on task complexity; with generally more activity in the IFG<sub>tri</sub> during  
50 discrimination compared to categorization, and a more intense decrease of the PFC in  
51 categorization compared to discrimination. Behaviourally, participants recognized almost all  
52 affective cues in all species vocalizations at above chance levels in the discrimination task (except  
53 for threatening bonobo calls). For categorization, they mostly correctly identified at levels  
54 significantly above chance affective contents in human and great ape vocalizations but not in  
55 macaque calls. Overall, these findings support the hypothesis of a pre-human origin of affective  
56 recognition processing inherited from our common ancestor with other great apes and processed  
57 in the frontal cortex. Our results also highlight behavioural differences related to task complexity,  
58 i.e. between categorization and discrimination processes, and the differential involvement of the  
59 PFC and the IFG<sub>tri</sub>, which seems necessary to explicitly decode affects in all primate vocalizations.

60 **Keywords:** categorization, discrimination, affect, vocalization, primate, NIRS, IFG, PFC

61  
62  
63  
64  
65  
66  
67  
68

## 69 Introduction

70 Human life is made of choices, especially in the social domain. How we should react to threatening  
71 or joyful voices expressed by others conditions how we thrive in a given society. While usually  
72 associated with irrational choices, emotions are in fact essential to guide cognitive processes to  
73 enable adaptive responses to the environment (Brosch et al., 2013). Over the last three decades,  
74 researchers in psychology (for a review, see Lerner, Li, Valdesolo, & Kassam, 2015) and  
75 neurosciences (for a review, see Phelps, Lempert, & Sokol-Hessner, 2014) have investigated the  
76 impact of emotions on decision-making processes. Far from being only limited to humans, there  
77 is also a deep evolutionary origin to such recognition mechanisms. Allowing animal species to  
78 evaluate social motivations of others (Albuquerque et al., 2016) and then to react adaptively to a  
79 pleasant or a dangerous situation (Mendl & Paul, 2020), these recognition mechanisms are crucial  
80 for the fitness of individuals (Anderson & Adolphs, 2014; Filippi et al., 2017). In fact, perhaps  
81 even more importantly than for our own species (*Homo sapiens*), to correctly identify an affective  
82 signal in vocalizations is often a matter of life or death in the animal kingdom. For example,  
83 research on non-human primates (from henceforth, primates), our closest relatives, have  
84 demonstrated the capacity of chimpanzees to distinguish between different kinds of calls as  
85 function of the severities of aggression (Slocombe et al., 2009). Similar results have been found in  
86 other primates, with Gouzoules reporting the abilities of macaques to differentiate the seriousness  
87 of an agonistic interaction while listening to the victim's calls (Gouzoules, 1984).

88  
89 Recent research in humans on these recognition mechanisms has emphasized the role of available  
90 sensory information as well as the different levels of complexity involved in the process during  
91 which a human makes a decision among several options (de Lange & Fritsche, 2017). In particular,  
92 perceptual decision-making involves processing sensory information, which are evaluated and  
93 integrated according to the goal and the internal state of an individual but also depending on the  
94 possible number of choices (Hauser & Salinas, 2014). An important aspect of this research is to  
95 investigate the cerebral basis of such recognition. However, neuroscience studies have mainly  
96 focused on the visual domain. Therefore, the neural bases of perceptual decision-making using  
97 affective auditory information remain to be investigated.

98  
99 Until now, functional Magnetic Resonance Imaging (fMRI) studies involving explicit recognition  
100 of affective cues in voices have emphasized the role of frontal regions, such as the inferior frontal  
101 cortex (IFG). For instance, Brück and colleagues have revealed a stronger activation in the IFG  
102 when the participants were explicitly decoding emotional prosody as compared to identifying  
103 phonetic or semantic aspects of speech (Brück et al., 2011). These results are in line with previous  
104 research showing a key role of the IFG in affective prosody decoding (Ethofer et al., 2006;  
105 Wildgruber et al., 2009). Furthermore, recent findings have highlighted the role of the IFG in the  
106 complexity of perceptual decision-making. The categorization (unbiased choice, 'A vs B') or the  
107 discrimination (biased choice, 'A vs non-A') of affective cues in voices indeed involves different  
108 subparts of the IFG, with the involvement of the *pars triangularis* (IFG<sub>tri</sub>) for discrimination and  
109 the involvement of the *pars opercularis* (IFG<sub>oper</sub>) for categorization respectively (Dricu et al.,  
110 2017).

111 Unlike IFG, the role of the prefrontal cortex (PFC), well-known for its involvement in decision-  
112 making (e.g. Brosch et al., 2013; Damasio, 1996), remains poorly explored in regards to the vocal  
113 decoding of emotions. Yet, the emergence of functional Near Infrared Spectroscopy (fNIRS), a  
114 non-invasive technique to study the brain hemodynamic (Boas et al., 2014) using the principle of  
115 tissue transillumination (Bright, 1831), may shed new lights on these processes. Indeed, fNIRS  
116 studies have investigated the role of PFC in emotional processing, highlighting its role in emotion  
117 regulation (Glotzbach et al., 2011) and emotion induction (Matsuo et al., 2003; Ohtani et al., 2005;  
118 Yang et al., 2007). Interestingly, recent fNIRS studies pointed out the roles of both PFC and IFG  
119 in the vocal decoding of emotions. For instance, Zhang and colleagues reported a strong  
120 involvement of the human PFC and IFG during the discrimination of affective voices (Zhang et  
121 al., 2018). Similarly, Gruber and colleagues highlighted the modulation of IFG activity depending  
122 on the categorization or the discrimination of affects in auditory stimuli (Gruber et al., 2020).  
123 Hence, more investigations on PFC and IFG activations are necessary to improve our knowledge  
124 of affective decoding. Moreover, the fNIRS methodology seems particularly adapted to the  
125 exploration of frontal regions in decision-making and emotional paradigms.

126  
127 Interestingly, anatomical structures (Petrides & Pandya, 2002; Rolls, 2004) and functions of the  
128 IFG and PFC in decision-making, auditory and affective processing are shared by most primate  
129 species, (e.g. macaques - *Macaca mulatta*; see Barbas, 2000; Barbas et al., 2011; Binder et al.,  
130 2004; Davidson, 1992; Frühholz & Grandjean, 2013; Kambara et al., 2018; LeDoux, 2012). In  
131 addition, as members of the *Hominidae* clade, which appeared between 13 and 18 million years  
132 ago (Perelman et al., 2011), modern humans share with the other living great apes (chimpanzees -  
133 *Pan troglodytes*, bonobos - *Pan Paniscus*, gorillas - *Gorilla subs*, and orangutans - *Pongo subs*) a  
134 large frontal cortex (Semendeferi et al., 2002). Overall, the fact that both humans and non-human  
135 primate species are able to identify correctly affective cues in conspecific vocalizations allowing  
136 them to use available information to make their choices; and that there is an anatomic and  
137 potentially functional convergence of the IFG and PFC across primate species, suggest that a  
138 comparative approach is particularly of interest to investigate the current role of these frontal  
139 regions in the human recognition of vocal emotions. Such approach may rely on primate calls  
140 beyond human vocalizations to uncover the evolutionary of human evaluation processes.

141  
142 Yet, only a few studies have used a comparative approach to understand affective decoding  
143 mechanisms in humans using primate vocalizations. These studies have revealed at both cerebral  
144 and behavioural levels promising results highlighting the importance of the phylogenetic  
145 proximity. For example, researchers emphasized the role of the right IFG and the right  
146 orbitofrontal cortex (OFC), part of the PFC regions, in the human ability to correctly discriminate  
147 agonistic or affiliative contents in chimpanzee screams only (Belin, Fecteau, et al., 2008; Fritz et  
148 al., 2018). Nevertheless, Linnankoski and colleagues have shown the abilities of human adults and  
149 infants to recognize affective cues in macaque vocalizations using a categorization paradigm  
150 (Linnankoski et al., 1994). This last result points out the difference of complexity between the  
151 discrimination and categorization tasks in humans, even if the affective recognition is related to  
152 primate vocalizations. Overall, more controlled investigations in this domain are thus needed  
153 (Gruber & Grandjean, 2017).

154  
155 Considering the paucity of neuroscientific studies adopting a comparative approach, the aim of the  
156 present study was to test the following questions using fNIRS: how are the human IFG and PFC  
157 regions involved in the explicit decoding of emotions contained in primate vocalizations? Is  
158 phylogenetic proximity a key for a better understanding of such processes? How does task  
159 complexity modulate the brain and behavioural responses across species and affect? To do so, we  
160 investigated human affective recognition processing in human and other primate vocalizations  
161 using cerebral and behavioural data. The participants performed categorization and discrimination  
162 tasks on affective contents (agonistic versus affiliative) in human, great apes (chimpanzee,  
163 bonobo) and monkey (rhesus macaque) vocalizations while their brain activity was recorded using  
164 fNIRS. We predicted that: i) according to the cognitive complexity hypothesis, the categorization  
165 task should involve more activations in the IFG and PFC than discrimination; ii) if a phylogenetic  
166 effect was at play, IFG and PFC would be modulated differently across human, great apes and  
167 monkey vocalizations; and iii) if frontal regions are necessary to cross-taxa recognition of affects,  
168 neural activity in the IFG and PFC should be related to the participants' performances.

## 169 170 **Material & Methods**

### 171 *Participants*

172 Thirty healthy volunteers (12 males; mean age 25.06 years, SD = 5.09, age range 20-36) took part  
173 in the experiment. The participants reported normal hearing abilities and normal or corrected-to-  
174 normal vision. No participant presented a neurological or psychiatric history, or a hearing  
175 impairment. All participants gave informed and written consent for their participation in  
176 accordance with the ethical and data security guidelines of the University of Geneva. The study  
177 was approved by the Ethics Cantonal Commission for Research of the Canton of Geneva,  
178 Switzerland (CCER).

### 179 *Vocalizations*

180 Ninety-six vocalizations of four primate species (human, chimpanzee, bonobo, rhesus macaque)  
181 in agonistic and affiliative contexts were used as stimuli. The human voices obtained from the  
182 Montreal Affective Voices (Belin, Fillion-Bilodeau, et al., 2008) were denoted as expressing a  
183 happy, angry or fearful affect (non-linguistic affective bursts) produced by two male and two  
184 female actors.

185 Vocalizations in corresponding contexts were selected for chimpanzee, bonobo and rhesus  
186 macaque species under the form of affiliative calls (food grunts), threatening calls (aggressor in  
187 agonistic context) and distress calls (victim in agonistic context). For each species, 24 stimuli were  
188 selected containing single calls or call sequences produced by 6 to 8 different individuals in their  
189 social environment.

190 All vocal stimuli were standardized to 750 milliseconds using PRAAT ([www.praat.org](http://www.praat.org)) but were  
191 not normalized in order to preserve the naturalness of the sounds (Ferdenzi et al., 2013).

192

193

194 *fNIRS acquisition*

195 fNIRS data were acquired using the Octamon device (Artinis Medical Systems B.V., Elst, The  
196 Netherlands) at 10 Hz with 6 transmitters and 2 receivers (wavelengths of  $\pm 760$  nm and  $\pm 850$  nm)  
197 with an inter-distance probes at 3.5 cm. The headband holding the 8 channels was placed  
198 identically for all participants according to the 10-20 electroencephalogram (EEG) system (Jasper,  
199 1958; Okamoto et al., 2004) by using the FPZ axis as landmark (see Figure 1). The probe locations  
200 into the Montreal Neurological Institute (MNI) space were estimated using the 3D coordinates  
201 extracted from 32 healthy participants (Vergotte et al., 2018). Hence, the channels 1, 2, 7 and 8  
202 were located on IFG<sub>tri</sub> and the channels 3, 4, 5 and 6 on the PFC.

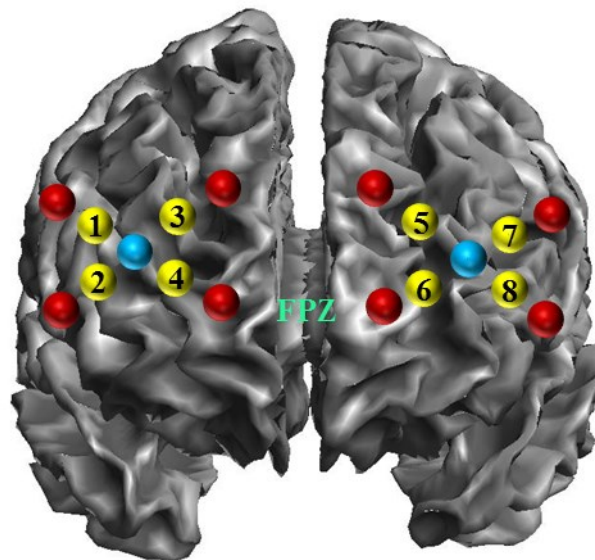

203

204 Figure 1: Probe locations into the MNI space by using SPM12 software implemented in MatLab  
205 R2018b ([www.fil.ion.ucl.ac.uk/spm/](http://www.fil.ion.ucl.ac.uk/spm/)). Red and blue dots indicate transmitters and receivers'  
206 positions respectively. Yellow dots indicate the channel numbers.

207 *Experimental procedure*

208 Seated comfortably in front of a computer, participants listened to the vocalizations played  
209 binaurally using Seinnheiser headphones at 70 dB SPL. Each of the 96 stimuli was repeated nine  
210 times across six separate blocks leading to 864 trials following a randomization process. The  
211 overall experiment was structured in various layers (Figure 2). Testing blocks were task-specific,  
212 with participants having to either perform a categorization task (A versus B) or a discrimination  
213 task (A versus non-A) in a single block. Participants completed three categorization blocks and  
214 three discrimination blocks, resulting in six blocks in total. Each block was made of 12 mini-  
215 blocks, each separated by a break of 10 seconds. These mini-blocks comprised one unique mini-  
216 block per species (human, chimpanzee, bonobo and rhesus macaque), each mini-block repeated 3  
217 times. Within each mini-block were 12 trials, containing four vocalisations from all three affective  
218 contexts (affiliative/happy; threatening/anger; fear) produced by a single species. The blocks,  
219 mini-blocks and stimuli were pseudo-randomly assigned for each participant to avoid more than  
220 two consecutive blocks, mini-blocks and stimuli from the same category.



221  
222 At the beginning of each block, participants were instructed to identify the affective content of the  
223 vocalizations using a keyboard. For instance, the instructions for the categorization task could be  
224 “Affiliative – press M or Threatening – press Z or Distress – press space bar”. Similarly, the  
225 instructions for discrimination could be “Affiliative – press Z or other affect – press M”. The  
226 pressed keys were randomly assigned across blocks and participants. The participants had to press  
227 the key during the 2-second intervals (jittering of 400 ms) between each stimulus. If the participant  
228 did not respond during this interval, the next stimulus followed automatically.

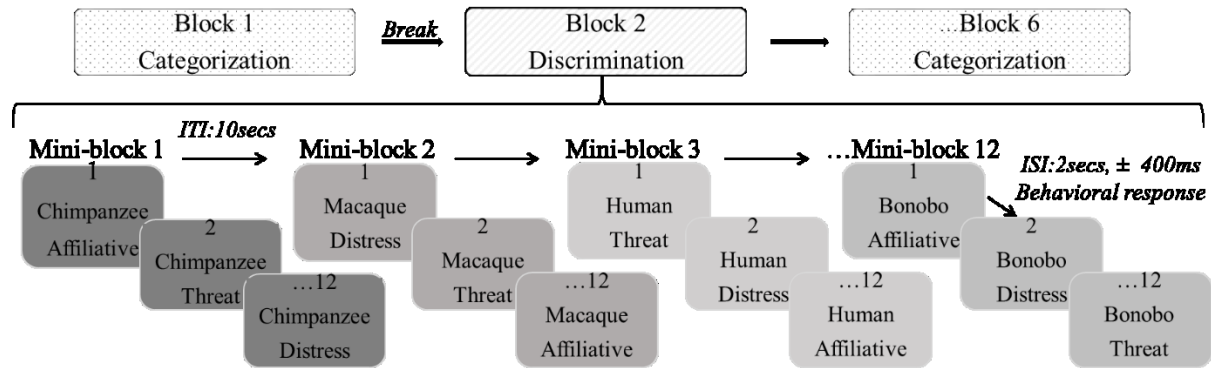

229  
230 Figure 2: Structure of the experiment, with each of the six blocks made of 12 mini-blocks, which  
231 in turn comprised 12 individual trials.

## 232 *Statistical analysis*

### 233 *Behavioural data*

234 Raw behavioural data from all participants were analysed using Generalized Linear Mixed Model  
235 (GLMM) fitted by Restricted Maximum Likelihood (REML) on R.studio (Team, 2020) with the  
236 “bobyqa” function (optimization by quadratic approximation with a set maximum of 1’000’000  
237 iterations) and the link “logit” for a standard logistic distribution or errors and a binomial error  
238 distribution (correct answer – 1 or not – 0) of the package Lme4 (Bates et al., 2015). The following  
239 three factors and their interactions were included: Species (human, chimpanzee, bonobo, and  
240 rhesus macaque), Tasks (categorization - CAT and discrimination - DIS), and Affects (affiliative,  
241 threat, and distress). Participant IDs and order of the blocks were used as random factors. In order  
242 to test our hypotheses regarding the phylogenetic distance and the task complexity on participants’  
243 performances we compared, using contrasts, the differences between Species and Affects within  
244 the categorization and the discrimination tasks. These contrasts were corrected with Bonferroni  
245 correction ( $P_{\text{corrected}} = .05/\text{number of tests} = .05/24 = .002$ ). Similarly, the participants’ reaction time  
246 (correct answers only) were analysed using a GLMM with a Gaussian distribution with the same  
247 contrasts and analysis as for accuracy. The present paper focusing on the investigation of  
248 recognition mechanisms, not attentional processes, results for reaction times are reported in  
249 supplementary material.

250

251

## 252 *fNIRS data*

253 Ten participants out of 30 were excluded from the dataset due to poor signal quality (large number  
254 of artefacts after filtering) or missing fNIRS data. A total of 20 participants were thus analysed in  
255 this study, in line with previous power analyses in fMRI (Desmond & Glover, 2002) and research  
256 using fNIRS to assess emotional processing in frontal areas (for a review, see Bendall et al., 2016).  
257 We performed on all channels the first level analysis with MatLab 2018b (Mathworks, Natick,  
258 MA) using the SPM\_fNIRS toolbox (Tak, Uga, Flandin, Dan, & Penny, 2016;  
259 [https://www.nitrc.org/projects/spm\\_fnirs/](https://www.nitrc.org/projects/spm_fnirs/)) and homemade scripts. Haemoglobin conversion and  
260 temporal pre-processing of O<sub>2</sub>Hb was made using the following procedure:

- 261 1. Haemoglobin concentration changes were calculated with the modified Beer-Lambert law  
262 (Delpy et al., 1988);
- 263 2. Motion artefacts were reduced using the movement artefact reduction algorithm (MARA -  
264 Scholkmann et al., 2010) based on moving standard deviation and spline interpolation;
- 265 3. Low frequency confound were reduced using a high-pass filter based on a discrete cosine  
266 transform set with a cut-off frequency of 1/64 Hz (Friston et al., 2000);
- 267 4. Physiological and high frequency noise such vasomotion or heart beats usually found in  
268 extra-cerebral blood flow were removed using a low-pass filter based on the hemodynamic  
269 response function (HRF - Friston et al., 2000).
- 270 5. O<sub>2</sub>Hb concentration changes were averaged between 4 and 12 seconds post stimulus onset  
271 on each trial to include the maximum peak amplitude of the HRF observed across  
272 participants. As for fMRI imaging, this method of analysis taking into account the slow  
273 hemodynamic time course of brain activity is in line with previous literature using auditory  
274 stimuli in fNIRS (e.g. Lloyd-Fox et al., 2014).

275 The second level analysis was performed on R. studio using GLMM fitted by REML with the  
276 factors: Species (human, chimpanzee, bonobo, rhesus macaque), Tasks (categorization versus  
277 discrimination), Affects (affiliative, threatening, distressful), as well as their interactions as fixed  
278 factors, and participant IDs and block orders as random factors for the right and left IFG<sub>tri</sub> and  
279 PFC.

## 280 *Interaction between participants' performance and brain Oxyhemoglobin (O<sub>2</sub>Hb) changes*

281 To test whether the IFG<sub>tri</sub> and PFC activations facilitated the participants' affective recognition,  
282 we used fNIRS data as continuous predictors in GLMM analysis performed on R. studio for  
283 accuracy. To perform this statistical interaction, we only used accuracy from the twenty  
284 participants included in fNIRS analyses. The GLMM fitted by REML included Species (human,  
285 chimpanzee, bonobo and rhesus macaque), Tasks (discrimination and categorization), Affects  
286 (threat, distress and affiliative), as fixed factors, fNIRS data from the right and left IFG<sub>tri</sub> and PFC  
287 as continuous predictors, and participant IDs as a random factor. To assess the variance explained  
288 by the phylogeny as well within the frontal activation, we tested all slopes with the following  
289 contrast: human vs [great apes (chimpanzee and bonobo)] vs rhesus macaque.

290

291



292 **Results**

293 *Accuracy*

294 We investigated how the perceptual decision-making complexity influenced the ability of human  
 295 participants to recognize affective contents in phylogenetically close or distant primate species  
 296 (see Figure 3).

297 Hence, participants were significantly above chance (>50% in discrimination; >33% in  
 298 categorization) for most of the affective cues in great ape vocalizations (threatening bonobo calls  
 299 excluded - see Table 1). Yet, they were unable to do so for threatening macaque calls in the  
 300 discrimination task and all affective vocalizations expressed by this species in the categorisation  
 301 one. Moreover, human participants were better at discriminating and then categorizing human  
 302 voices (threat = DIS 76%; CAT 60%, distress = DIS 77%; CAT 68%, affiliative = DIS 83%; CAT  
 303 69%), chimpanzee distress (DIS 65%; CAT 50%) and threatening (DIS 63%; CAT 50%)  
 304 vocalizations, followed by distress and affiliative calls expressed by bonobos (DIS 62%; CAT 46%  
 305 for both) and macaques in the discrimination task (62%).

306

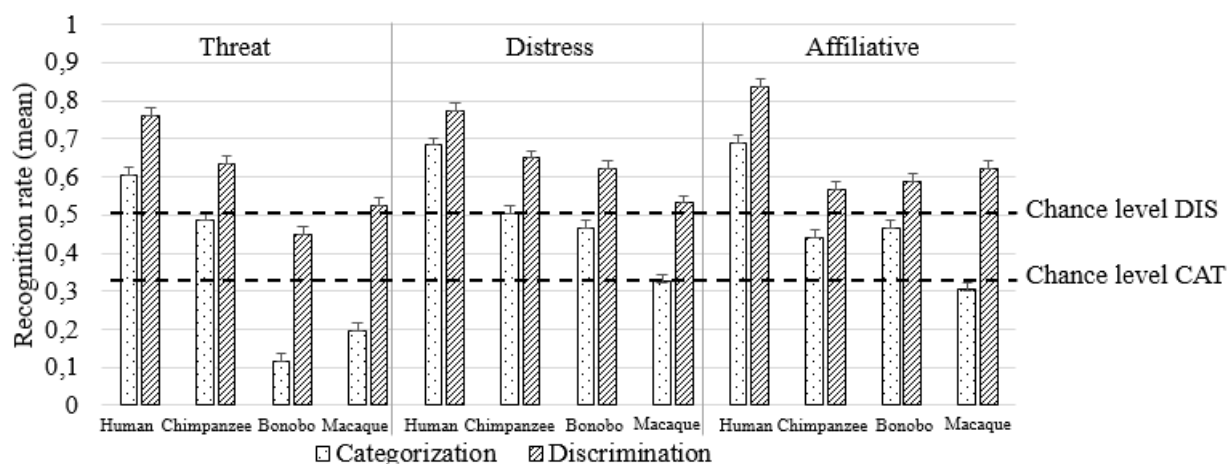

307  
 308 Figure 3: Mean and SE of human recognition of primate affective vocalizations for categorization  
 309 (CAT) and discrimination (DIS) tasks and the different kinds of affective vocalizations. All  
 310 contrasts were significant within each condition after Bonferroni correction with  $P_{corrected} =$   
 311  $.05/24 = .002$ , excluding the following contrasts: chimpanzee vs macaque and bonobo vs macaque  
 312 for affiliative cues and bonobo vs macaque for threatening contents in discrimination task (see  
 313 supplementary material Table 1).

314  
 315  
 316  
 317  
 318  
 319  
 320

321 Table 1: Summary of the one sample t-test analyses against chance level. Recognition performance  
 322 above chance (>33% categorisation and >50% discrimination) are written in bold. \*\*\*  $p < .001$ , \*  
 323  $p < .05$ .

324

|            | Categorization  |                 |                 | Discrimination  |                 |                 |
|------------|-----------------|-----------------|-----------------|-----------------|-----------------|-----------------|
|            | Threat          | Distress        | Affiliative     | Threat          | Distress        | Affiliative     |
| Bonobo     | -22.19***       | <b>8.95***</b>  | <b>8.96***</b>  | -3.44***        | <b>8.26***</b>  | <b>5.9***</b>   |
| Chimpanzee | <b>10.27***</b> | <b>11.41***</b> | <b>7.35***</b>  | <b>9.15***</b>  | <b>10.19***</b> | <b>4.51***</b>  |
| Human      | <b>18.47***</b> | <b>25.07***</b> | <b>25.67***</b> | <b>19.92***</b> | <b>21.33***</b> | <b>29.51***</b> |
| Macaque    | -11.15***       | -0.41           | -1.93           | 1.53            | <b>2.02*</b>    | <b>8.13***</b>  |

325

### 326 *fNIRS data*

327 A significant main effect was found for the factor Tasks in the right IFG<sub>tri</sub> ( $\chi^2(1) = 14.27$ ,  $p < .001$ ),  
 328 left IFG<sub>tri</sub> ( $\chi^2(1) = 3.89$ ,  $p < .05$ ); right PFC ( $\chi^2(1) = 107.32$ ,  $p < 0.001$ ) and left PFC ( $\chi^2(1) = 90.83$ ,  
 329  $p < .001$ ) revealing more O<sub>2</sub>Hb concentration changes for the discrimination compared to the  
 330 categorization task for all ROIs (see Figure 4). Note that none of the interactions with the factors  
 331 Affects and Species reached significance.  
 332

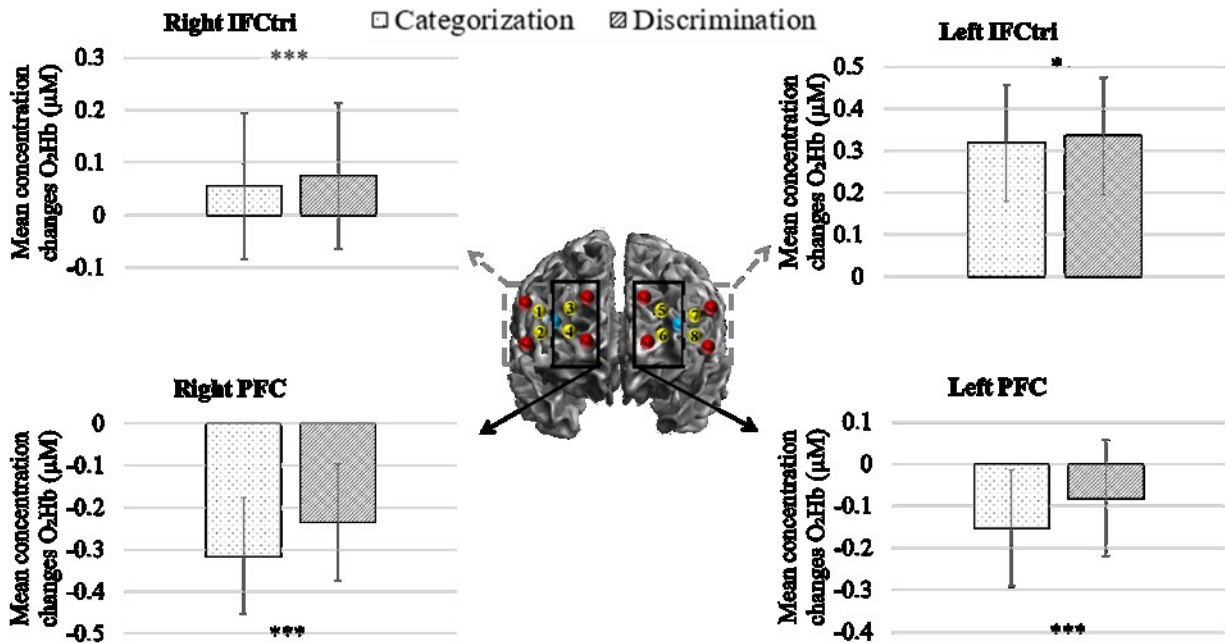

333

334 Figure 4: Mean and SE of concentration changes of O<sub>2</sub>Hb ( $\mu\text{M}$ ) in right and left PFC and IFG<sub>tri</sub>  
 335 during the categorization and the discrimination tasks by human participants of primate affective  
 336 vocalizations. \*\*\*  $p < .001$ , \*  $p < .05$ .

337

338

### 339 *Interaction between participants' performance and brain O<sub>2</sub>Hb changes*

340 All factors (Tasks, Species and Affects) with the fNIRS data of the right and left IFG<sub>tri</sub> and PFC  
341 as continuous predictors contributed to a significant three-way interaction ( $\chi^2(24) = 202,28$   $p <$   
342  $.001$ ).

343 Within this model, we then assessed how the affective contents modulated IFG<sub>tri</sub> and PFC activity  
344 across species vocalizations during the categorization or discrimination tasks. For this purpose, we  
345 investigated whether the participants' accuracy and the related fNIRS data were positively,  
346 negatively or not correlated for each Species and ROIs within the Affects and Tasks factors using  
347 odd-ratio summarized in Table 2. In particular we tested whether phylogenetic proximity  
348 facilitated the recognition of Affect. We found for both the IFG<sub>tri</sub> and PFC that contrasts between  
349 humans *vs* [great apes (chimpanzees and bonobos)] *vs* rhesus macaques within each Affect and  
350 Task were significant at  $p < .001$  (see supplementary material Table 3). Note that because we found  
351 similar patterns of performances between PFC and IFG<sub>tri</sub>, for more clarity, we will only describe  
352 the results for IFG<sub>tri</sub> here (see Figure 5). Results for PFC are reported in supplementary material  
353 Figure 3.

354 Hence, participants better discriminated agonistic (threat and distress) chimpanzee calls when the  
355 concentration changes of O<sub>2</sub>Hb increased in IFG<sub>tri</sub> and PFC. At the opposite, during the  
356 categorization task, the correct identification of all types of chimpanzee calls as well as affiliative  
357 macaque and agonistic bonobo vocalizations were associated with a decrease of activity in frontal  
358 regions.

359

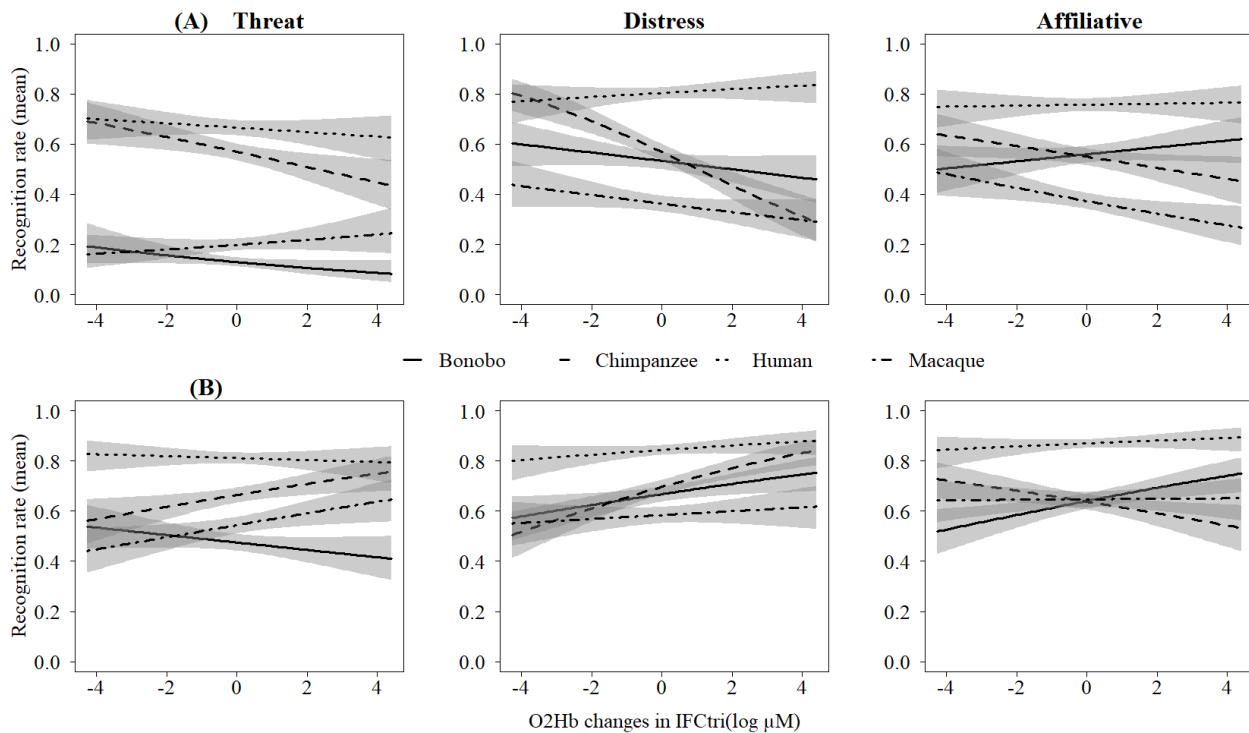

360

361 Figure 5: Interaction between participants' accuracy and O<sub>2</sub>Hb concentration changes in IFG<sub>tri</sub>  
362 within each affect and species for (A) categorization and (B) discrimination. Confidence interval  
363 at 0.95. Figures were made on R.studio using the package Visreg (Breheny & Burchett, 2017).

364 Table 2: Summary of the odds ratio and p-values testing the statistical significance and the  
365 direction of logistic regression slopes from the three-way interaction. The odds ratio quantifies the  
366 strength of the association between two factors. If the slope is significant and odds ratio < 1, factors  
367 are negatively correlated (written in bold); if the slope is significant and odds ratio > 1, factors are  
368 positively correlated (written in bold italic). \*\*  $p < .01$ , \*  $p < .05$ .

369

|            | Categorization |               |              | Discrimination      |                      |             |
|------------|----------------|---------------|--------------|---------------------|----------------------|-------------|
|            | Threat         | Distress      | Affiliative  | Threat              | Distress             | Affiliative |
| Bonobo     | <b>0.84*</b>   | <b>0.88*</b>  | 1.06         | 0.99                | 1.1                  | 1.06        |
| Chimpanzee | <b>0.78*</b>   | <b>0.69**</b> | <b>0.86*</b> | <b><i>1.28*</i></b> | <b><i>1.44**</i></b> | 0.93        |
| Human      | 1.02           | 1.13          | 1.11         | 0.98                | 0.89                 | 1.02        |
| Macaque    | 1.07           | 0.94          | <b>0.85*</b> | 0.93                | 0.9                  | 1.05        |

370

## 371 Discussion

372 The present study emphasized the different levels of complexity in decision-making processes  
373 underlying the human recognition of affects in human and non-human primate vocalizations. In  
374 particular, we demonstrated that the left IFG<sub>tri</sub> and the right PFC were strongly involved in the  
375 discrimination task compared to the categorization one.

376 Interestingly, and perhaps, contradictorily, we initially expected more activation in IFG<sub>tri</sub> for the  
377 categorization task (unbiased choice) because of the existing literature on human affective voices  
378 (Dricu et al., 2017; Gruber et al., 2020). However, taking into account our behavioural results  
379 showing higher recognition performances in discrimination compared to categorization, more  
380 activity in IFG<sub>tri</sub> appears to be required to enable participants to perform better during the  
381 discrimination of primate vocalizations. At the opposite, in line with the cognitive complexity  
382 hypothesis, analyses for PFC revealed a stronger deactivation in the categorization task. We could  
383 link these last findings to the changes in regional cerebral blood flow. Indeed, Matsukawa and  
384 collaborators showed that during the passive viewing of emotional videos, the activity of PFC  
385 decreased in correlation to the reduction of facial skin blood flow (Matsukawa et al., 2018).  
386 Interestingly, these authors suggested that PFC activity might elicit an autonomic reaction with a  
387 vasoconstriction or a vasodilatation of cutaneous vessels. In the same line, George and  
388 collaborators demonstrated a stronger decrease of activity in right PFC during the viewing of  
389 pleasant pictures, also relying on a reduction of the frontal blood flow (George et al., 1995). A  
390 possibility is thus to extend the results of these visual studies to a decrease of activity in PFC  
391 regions during affective auditory processing.

392 Overall, our results highlight the distinct roles of the IFG<sub>tri</sub> and the PFC in evaluative judgment  
393 and decision task in affective primate calls recognition (see Schirmer & Kotz, 2006; Wagner &  
394 Watson, 2010 for humans).

395 Was human recognition influenced by the affects and/or the species that expressed the  
396 vocalizations? We did find an influence of these factors on behavioural responses and the  
397 interaction between participants' performances and frontal activations. In fact, we demonstrated  
398 that the correct categorization of agonistic cues in bonobo and chimpanzee vocalizations elicited  
399 a significant decrease of activity in the IFG<sub>tri</sub> and the PFC. These results might be related to an

400 inhibition process enabling participants to reduce a high level of stress elicited by agonistic calls,  
401 i.e. automatic regulation. Frontal regions are indeed the most sensitive brain areas to stress  
402 exposure (Arnsten, 2009). Interestingly, a decrease of activation in frontal regions was also  
403 associated to better performance in the categorization task for affiliative chimpanzee and macaque  
404 vocalizations. On the contrary, in the discrimination task, agonistic chimpanzee screams were  
405 better identified when the level of activity in IFG<sub>tri</sub> and PFC increased. These results highlight the  
406 involvement of distinct mechanisms between the categorization and discrimination tasks in cross-  
407 taxa recognition. For instance, possible inhibition processes elicited by agonistic cues would rely  
408 on a decrease of activations in frontal regions for the simple choice between A versus non-A; while  
409 in categorisation (unbiased choice), similar inhibition mechanisms would require an enhancement  
410 of activity in IFG<sub>tri</sub> and PFC.

411 The general absence of interaction between frontal activations and behaviours for human voices  
412 might be explained by three different mechanisms. First, for humans, because affective voices in  
413 our modern human societies are everywhere (Belin, 2006), the correct recognition of affects may  
414 not necessary involve particular frontal activations due to the human expertise in human voice  
415 processing. Second, the involvement of IFG has often been demonstrated in the literature for the  
416 recognition of emotional voices contrasted with neutral ones (e.g. Frühholz et al., 2012; Frühholz  
417 & Grandjean, 2013; Gruber et al., 2020; Sander et al., 2005; Zhang et al., 2018). Yet, in our study,  
418 we did not include such stimuli, comparing cerebral activations across the affective contents. This  
419 difference in our experimental paradigm may have led to the absence of interaction between the  
420 hemodynamic response in the frontal regions and the emotional recognition in human voices.  
421 Third, encompassing three neuroanatomical and functional subparts: *pars triangularis*, *pars*  
422 *orbitalis* and *pars opercularis* (Cai & Leung, 2011), IFG<sub>tri</sub> would possibly requires the recognition  
423 of infrequent vocalizations expressed by evolutionary close species to be modulated. Following  
424 this, the phylogenetic gap of 25-33 million between rhesus macaque and the *Hominidae* branch  
425 might explain the lack of result for this monkey species. Performances on the macaque calls  
426 categorization were poor, hence the frontal activations would not help to categorize them because  
427 human participants were, at least in this experiment, unable to categorize these calls. In contrast,  
428 participants were able to categorize most affects in great ape vocalizations, to the exception of  
429 threatening bonobo calls.

430 Yet, such reasoning does not apply to discrimination, where the low level of cognitive complexity  
431 involved may have allowed participants to discriminate more correctly affective vocalizations of  
432 all primates, including species with larger phylogenetic distances such as macaques. Strikingly,  
433 behavioural analyses revealed that human participants were able to discriminate most of the  
434 affective cues in all species vocalizations, once again to the exception of threatening bonobo calls.  
435 We might hypothesize that specific acoustic factors in bonobo calls triggered this effect: bonobo  
436 calls have indeed a higher fundamental frequency resulting from a shorter vocal length in  
437 comparison to chimpanzees. In this species, signalling physical strength using low frequencies  
438 (e.g. Briefer, 2012; Morton, 1982) is not a sexually selected trait (Grawunder et al., 2018). This  
439 reflects in their general behaviour, with bonobos being quite different from closely related  
440 chimpanzees and overall less aggression prone: they are occasional hunters, do not have strict  
441 territories and have a developed socio-sexuality, reducing the number of aggressive conflicts  
442 (Gruber & Clay, 2016).



443 To conclude, our findings demonstrate the interplay between cerebral and behavioural processes  
444 during the recognition by humans of affective cues in primate vocalizations. Decision-making  
445 complexity, phylogeny and behaviour seem four essential markers to consider for further studies  
446 on cross-taxa recognition. Overall, we demonstrated the difference of mechanisms between the  
447 categorization and discrimination of primate affective calls at both behavioural and cerebral levels.  
448 In particular, we showed various activations in the PFC and IFG<sub>tri</sub> and their connection to the  
449 ability of humans to correctly identify affective cues in great apes and monkeys' vocalizations.  
450 Furthermore, our results highlighted the importance of the phylogenetic proximity in affective  
451 recognition processes. Finally, to our knowledge, this study is the first to: i) distinguish  
452 categorization and discrimination processes in a neuroscientific experiment with a comparative  
453 perspective, and ii) to assess the link between cross-taxa affective recognition and frontal  
454 activations in a fNIRS paradigm. We hope these new findings will contribute to a better  
455 understanding of the evolutionary origins of emotional processing and decision-making origin in  
456 human, as well as advocate for the inclusion of a broader array of auditory stimuli.

457

## 458 **Acknowledgements**

459 We thank Katie Slocombe very much for providing chimpanzee and macaque auditory stimuli as  
460 well as extensive comments on former versions of this preprint. We would like also to thanks Dr.  
461 Ben Meuleman for his useful support on statistical analyses. We thank the Swiss National Science  
462 foundation (SNSF) for supporting this interdisciplinary project (CR13I1\_162720 / 1 – DG-TG),  
463 and the Swiss Center for Affective Sciences. ZC has received support from the ESRC-ORA  
464 (ES/S015612/1), the ERC Starting Grant (802979, and CD from the foundation Ernst and Lucie  
465 Schmidheiny. TG was additionally supported by a grant of the SNSF during the final re-writing of  
466 this article (grant PCEFPI\_186832).

467

## 468 **References**

- 469 Albuquerque, N., Guo, K., Wilkinson, A., Savalli, C., Otta, E., & Mills, D. (2016). Dogs recognize  
470 dog and human emotions. *Biology Letters*, *12*(1), 20150883.  
471 <https://doi.org/10.1098/rsbl.2015.0883>
- 472 Anderson, D. J., & Adolphs, R. (2014). A Framework for Studying Emotions Across Phylogeny.  
473 *Cell*, *157*(1), 187–200. <https://doi.org/10.1016/j.cell.2014.03.003>
- 474 Arnsten, A. F. T. (2009). Stress signalling pathways that impair prefrontal cortex structure and  
475 function. *Nature Reviews. Neuroscience*, *10*(6), 410–422. <https://doi.org/10.1038/nrn2648>
- 476 Bates, D., Mächler, M., Bolker, B., & Walker, S. (2015). Fitting Linear Mixed-Effects Models  
477 Using lme4. *Journal of Statistical Software*, *67*(1), 1–48.  
478 <https://doi.org/10.18637/jss.v067.i01>
- 479 Belin, P. (2006). Voice processing in human and non-human primates. *Philosophical Transactions*  
480 *of the Royal Society B: Biological Sciences*, *361*(1476), 2091–2107.  
481 <https://doi.org/10.1098/rstb.2006.1933>



- 482 Belin, P., Fecteau, S., Charest, I., Nicastro, N., Hauser, M. D., & Armony, J. L. (2008). Human  
483 cerebral response to animal affective vocalizations. *Proceedings. Biological Sciences*,  
484 *275*(1634), 473–481. <https://doi.org/10.1098/rspb.2007.1460>
- 485 Belin, P., Fillion-Bilodeau, S., & Gosselin, F. (2008). The Montreal Affective Voices: A validated  
486 set of nonverbal affect bursts for research on auditory affective processing. *Behavior*  
487 *Research Methods*, *40*(2), 531–539. <https://doi.org/10.3758/BRM.40.2.531>
- 488 Bendall, R. C. A., Eachus, P., & Thompson, C. (2016). A Brief Review of Research Using Near-  
489 Infrared Spectroscopy to Measure Activation of the Prefrontal Cortex during Emotional  
490 Processing: The Importance of Experimental Design. *Frontiers in Human Neuroscience*,  
491 *10*, 529. <https://doi.org/10.3389/fnhum.2016.00529>
- 492 Boas, D. A., Elwell, C. E., Ferrari, M., & Taga, G. (2014). Twenty years of functional near-infrared  
493 spectroscopy: Introduction for the special issue. *NeuroImage*, *85*, 1–5.  
494 <https://doi.org/10.1016/j.neuroimage.2013.11.033>
- 495 Breheny, P., & Burchett, W. (2017). Visualization of Regression Models Using visreg. *The R*  
496 *Journal*, *9*(2), 56. <https://doi.org/10.32614/RJ-2017-046>
- 497 Briefer, E. (2012). Vocal Expression of Emotions in Mammals: Mechanisms of Production and  
498 Evidence. *Communication Skills*. <https://animalstudiesrepository.org/comski/1>
- 499 Bright, R. (1831). *Reports of medical cases selected with a view of illustrating the symptoms and*  
500 *cure of diseases by reference to morbid anatomy, case ccv "diseases of the brain and*  
501 *nervous system."* *2*(3), 431.
- 502 Brosch, T., Scherer, K., Grandjean, D., & Sander, D. (2013). The impact of emotion on perception,  
503 attention, memory, and decision-making. *Swiss Medical Weekly*, *143*(1920).  
504 <https://doi.org/10.4414/smw.2013.13786>
- 505 Brück, C., Kreifelts, B., Kaza, E., Lotze, M., & Wildgruber, D. (2011). Impact of personality on  
506 the cerebral processing of emotional prosody. *NeuroImage*, *58*(1), 259–268.  
507 <https://doi.org/10.1016/j.neuroimage.2011.06.005>
- 508 Cai, W., & Leung, H.-C. (2011). Rule-guided executive control of response inhibition: Functional  
509 topography of the inferior frontal cortex. *PloS One*, *6*(6), e20840.  
510 <https://doi.org/10.1371/journal.pone.0020840>
- 511 Damasio, A. R. (1996). The somatic marker hypothesis and the possible functions of the prefrontal  
512 cortex. *Philosophical Transactions of the Royal Society of London. Series B, Biological*  
513 *Sciences*, *351*(1346), 1413–1420. <https://doi.org/10.1098/rstb.1996.0125>
- 514 de Lange, F. P., & Fritsche, M. (2017). Perceptual Decision-Making: Picking the Low-Hanging  
515 Fruit? *Trends in Cognitive Sciences*, *21*(5), 306–307.  
516 <https://doi.org/10.1016/j.tics.2017.03.006>
- 517 Delpy, D. T., Cope, M., van der Zee, P., Arridge, S., Wray, S., & Wyatt, J. (1988). Estimation of  
518 optical pathlength through tissue from direct time of flight measurement. *Physics in*  
519 *Medicine and Biology*, *33*(12), 1433–1442.

- 520 Desmond, J. E., & Glover, G. H. (2002). Estimating sample size in functional MRI (fMRI)  
521 neuroimaging studies: Statistical power analyses. *Journal of Neuroscience Methods*,  
522 *118*(2), 115–128. [https://doi.org/10.1016/s0165-0270\(02\)00121-8](https://doi.org/10.1016/s0165-0270(02)00121-8)
- 523 Dricu, M., Ceravolo, L., Grandjean, D., & Frühholz, S. (2017). Biased and unbiased perceptual  
524 decision-making on vocal emotions. *Scientific Reports*, *7*(1), 16274.  
525 <https://doi.org/10.1038/s41598-017-16594-w>
- 526 Ethofer, T., Anders, S., Erb, M., Herbert, C., Wiethoff, S., Kissler, J., Grodd, W., & Wildgruber,  
527 D. (2006). Cerebral pathways in processing of affective prosody: A dynamic causal  
528 modeling study. *NeuroImage*, *30*(2), 580–587.  
529 <https://doi.org/10.1016/j.neuroimage.2005.09.059>
- 530 Ferdenzi, C., Patel, S., Mehu-Blantar, I., Khidasheli, M., Sander, D., & Delplanque, S. (2013).  
531 Voice attractiveness: Influence of stimulus duration and type. *Behavior Research Methods*,  
532 *45*(2), 405–413. <https://doi.org/10.3758/s13428-012-0275-0>
- 533 Filippi, P., Congdon, J. V., Hoang, J., Bowling, D. L., Reber, S. A., Pašukonis, A., Hoeschele, M.,  
534 Ocklenburg, S., de Boer, B., Sturdy, C. B., Newen, A., & Güntürkün, O. (2017). Humans  
535 recognize emotional arousal in vocalizations across all classes of terrestrial vertebrates:  
536 Evidence for acoustic universals. *Proceedings of the Royal Society B: Biological Sciences*,  
537 *284*(1859), 20170990. <https://doi.org/10.1098/rspb.2017.0990>
- 538 Friston, K. J., Josephs, O., Zarahn, E., Holmes, A. P., Rouquette, S., & Poline, J. (2000). To smooth  
539 or not to smooth? Bias and efficiency in fMRI time-series analysis. *NeuroImage*, *12*(2),  
540 196–208. <https://doi.org/10.1006/nimg.2000.0609>
- 541 Fritz, T., Mueller, K., Guha, A., Gouws, A., Levita, L., Andrews, T. J., & Slocombe, K. E. (2018).  
542 Human behavioural discrimination of human, chimpanzee and macaque affective  
543 vocalisations is reflected by the neural response in the superior temporal sulcus.  
544 *Neuropsychologia*, *111*, 145–150. <https://doi.org/10.1016/j.neuropsychologia.2018.01.026>
- 545 Frühholz, S., Ceravolo, L., & Grandjean, D. (2012). Specific brain networks during explicit and  
546 implicit decoding of emotional prosody. *Cerebral Cortex (New York, N.Y.: 1991)*, *22*(5),  
547 1107–1117. <https://doi.org/10.1093/cercor/bhr184>
- 548 Frühholz, S., & Grandjean, D. (2013). Processing of emotional vocalizations in bilateral inferior  
549 frontal cortex. *Neuroscience and Biobehavioral Reviews*, *37*(10 Pt 2), 2847–2855.  
550 <https://doi.org/10.1016/j.neubiorev.2013.10.007>
- 551 George, M. S., Ketter, T. A., Parekh, P. I., Horwitz, B., Herscovitch, P., & Post, R. M. (1995).  
552 Brain activity during transient sadness and happiness in healthy women. *The American*  
553 *Journal of Psychiatry*, *152*(3), 341–351. <https://doi.org/10.1176/ajp.152.3.341>
- 554 Glotzbach, E., Mühlberger, A., Gschwendtner, K., Fallgatter, A. J., Pauli, P., & Herrmann, M. J.  
555 (2011). Prefrontal Brain Activation During Emotional Processing: A Functional Near  
556 Infrared Spectroscopy Study (fNIRS). *The Open Neuroimaging Journal*, *5*, 33–39.  
557 <https://doi.org/10.2174/1874440001105010033>

- 558 Gouzoules, S. (1984). Primate mating systems, kin associations, and cooperative behavior:  
559 Evidence for kin recognition? *American Journal of Physical Anthropology*, 27(S5), 99–  
560 134. <https://doi.org/10.1002/ajpa.1330270506>
- 561 Grawunder, S., Crockford, C., Clay, Z., Kalan, A. K., Stevens, J. M. G., Stoessel, A., & Hohmann,  
562 G. (2018). Higher fundamental frequency in bonobos is explained by larynx morphology.  
563 *Current Biology: CB*, 28(20), R1188–R1189. <https://doi.org/10.1016/j.cub.2018.09.030>
- 564 Gruber, T., & Clay, Z. (2016). A Comparison Between Bonobos and Chimpanzees: A Review and  
565 Update. *Evolutionary Anthropology: Issues, News, and Reviews*, 25(5), 239–252.  
566 <https://doi.org/10.1002/evan.21501>
- 567 Gruber, T., Debracque, C., Ceravolo, L., Igloi, K., Marin Bosch, B., Frühholz, S., & Grandjean,  
568 D. (2020). Human Discrimination and Categorization of Emotions in Voices: A Functional  
569 Near-Infrared Spectroscopy (fNIRS) Study. *Frontiers in Neuroscience*, 14.  
570 <https://doi.org/10.3389/fnins.2020.00570>
- 571 Gruber, T., & Grandjean, D. M. (2017). A comparative neurological approach to emotional  
572 expressions in primate vocalizations. *Neuroscience and Biobehavioral Reviews*, 73, 182–  
573 190.
- 574 Hauser, C. K., & Salinas, E. (2014). Perceptual Decision Making. In D. Jaeger & R. Jung (Eds.),  
575 *Encyclopedia of Computational Neuroscience* (pp. 1–21). Springer New York.  
576 [https://doi.org/10.1007/978-1-4614-7320-6\\_317-1](https://doi.org/10.1007/978-1-4614-7320-6_317-1)
- 577 Jasper, H. H. (1958). *The Ten-Twenty Electrode System of the International Federation*. 10, 371–  
578 375.
- 579 Lerner, J. S., Li, Y., Valdesolo, P., & Kassam, K. S. (2015). Emotion and Decision Making. *Annual*  
580 *Review of Psychology*, 66(1), 799–823. <https://doi.org/10.1146/annurev-psych-010213-115043>
- 582 Linnankoski, I., Laakso, M., Aulanko, R., & Leinonen, L. (1994). Recognition of emotions in  
583 macaque vocalizations by children and adults. *Language & Communication*, 14(2), 183–  
584 192. [https://doi.org/10.1016/0271-5309\(94\)90012-4](https://doi.org/10.1016/0271-5309(94)90012-4)
- 585 Lloyd-Fox, S., Papademetriou, M., Darboe, M. K., Everdell, N. L., Wegmuller, R., Prentice, A.  
586 M., Moore, S. E., & Elwell, C. E. (2014). Functional near infrared spectroscopy (fNIRS)  
587 to assess cognitive function in infants in rural Africa. *Scientific Reports*, 4, 4740.  
588 <https://doi.org/10.1038/srep04740>
- 589 Matsukawa, K., Asahara, R., Yoshikawa, M., & Endo, K. (2018). Deactivation of the prefrontal  
590 cortex during exposure to pleasantly-charged emotional challenge. *Scientific Reports*, 8(1),  
591 14540. <https://doi.org/10.1038/s41598-018-32752-0>
- 592 Matsuo, K., Kato, T., Taneichi, K., Matsumoto, A., Ohtani, T., Hamamoto, T., Yamasue, H.,  
593 Sakano, Y., Sasaki, T., Sadamatsu, M., Iwanami, A., Asukai, N., & Kato, N. (2003).  
594 Activation of the prefrontal cortex to trauma-related stimuli measured by near-infrared  
595 spectroscopy in posttraumatic stress disorder due to terrorism. *Psychophysiology*, 40(4),  
596 492–500. <https://doi.org/10.1111/1469-8986.00051>

- 597 Mendl, M., & Paul, E. S. (2020). Animal affect and decision-making. *Neuroscience &*  
598 *Biobehavioral Reviews*, *112*, 144–163. <https://doi.org/10.1016/j.neubiorev.2020.01.025>
- 599 Morton, E. S. (1982). Grading, discreteness, redundancy, and motivation-structural rules. In  
600 *Acoustic Communication in Birds* (Kroodsma, D.E., Miller, E.H. and Ouellet, H., pp. 182–  
601 212). Academic Press.
- 602 Ohtani, T., Matsuo, K., Kasai, K., Kato, T., & Kato, N. (2005). Hemodynamic response to  
603 emotional memory recall with eye movement. *Neuroscience Letters*, *380*(1), 75–79.  
604 <https://doi.org/10.1016/j.neulet.2005.01.020>
- 605 Okamoto, M., Dan, H., Sakamoto, K., Takeo, K., Shimizu, K., Kohno, S., Oda, I., Isobe, S.,  
606 Suzuki, T., Kohyama, K., & Dan, I. (2004). Three-dimensional probabilistic anatomical  
607 cranio-cerebral correlation via the international 10-20 system oriented for transcranial  
608 functional brain mapping. *NeuroImage*, *21*(1), 99–111.
- 609 Perelman, P., Johnson, W. E., Roos, C., Seuánez, H. N., Horvath, J. E., Moreira, M. A. M.,  
610 Kessing, B., Pontius, J., Roelke, M., Rumpler, Y., Schneider, M. P. C., Silva, A., O'Brien,  
611 S. J., & Pecon-Slattery, J. (2011). A Molecular Phylogeny of Living Primates. *PLOS*  
612 *Genetics*, *7*(3), e1001342. <https://doi.org/10.1371/journal.pgen.1001342>
- 613 Petrides, M., & Pandya, D. N. (2002). Comparative cytoarchitectonic analysis of the human and  
614 the macaque ventrolateral prefrontal cortex and corticocortical connection patterns in the  
615 monkey. *The European Journal of Neuroscience*, *16*(2), 291–310.  
616 <https://doi.org/10.1046/j.1460-9568.2001.02090.x>
- 617 Phelps, E. A., Lempert, K. M., & Sokol-Hessner, P. (2014). Emotion and decision making:  
618 Multiple modulatory neural circuits. *Annual Review of Neuroscience*, *37*, 263–287.  
619 <https://doi.org/10.1146/annurev-neuro-071013-014119>
- 620 Rolls, E. T. (2004). Convergence of sensory systems in the orbitofrontal cortex in primates and  
621 brain design for emotion. *The Anatomical Record Part A: Discoveries in Molecular,*  
622 *Cellular, and Evolutionary Biology*, *281A*(1), 1212–1225.  
623 <https://doi.org/10.1002/ar.a.20126>
- 624 Sander, D., Grandjean, D., Pourtois, G., Schwartz, S., Seghier, M. L., Scherer, K. R., &  
625 Vuilleumier, P. (2005). Emotion and attention interactions in social cognition: Brain  
626 regions involved in processing anger prosody. *NeuroImage*, *28*(4), 848–858.  
627 <https://doi.org/10.1016/j.neuroimage.2005.06.023>
- 628 Schirmer, A., & Kotz, S. A. (2006). Beyond the right hemisphere: Brain mechanisms mediating  
629 vocal emotional processing. *Trends in Cognitive Sciences*, *10*(1), 24–30.  
630 <https://doi.org/10.1016/j.tics.2005.11.009>
- 631 Scholkmann, F., Spichtig, S., Muehlemann, T., & Wolf, M. (2010). How to detect and reduce  
632 movement artifacts in near-infrared imaging using moving standard deviation and spline  
633 interpolation. *Physiological Measurement*, *31*(5), 649–662. [https://doi.org/10.1088/0967-](https://doi.org/10.1088/0967-3334/31/5/004)  
634 [3334/31/5/004](https://doi.org/10.1088/0967-3334/31/5/004)

- 635 Slocombe, K. E., Townsend, S. W., & Zuberbühler, K. (2009). Wild chimpanzees (*Pan troglodytes*  
636 *schweinfurthii*) distinguish between different scream types: Evidence from a playback  
637 study. *Animal Cognition*, *12*(3), 441–449. <https://doi.org/10.1007/s10071-008-0204-x>
- 638 Tak, S., Uga, M., Flandin, G., Dan, I., & Penny, W. D. (2016). Sensor space group analysis for  
639 fNIRS data. *Journal of Neuroscience Methods*, *264*, 103–112.  
640 <https://doi.org/10.1016/j.jneumeth.2016.03.003>
- 641 Team, R. (2020). *RStudio: Integrated Development for R*. RStudio. RStudio, Inc.  
642 <https://rstudio.com/>
- 643 Vergotte, G., Perrey, S., Muthuraman, M., Janaqi, S., & Torre, K. (2018). Concurrent Changes of  
644 Brain Functional Connectivity and Motor Variability When Adapting to Task Constraints.  
645 *Frontiers in Physiology*, *9*. <https://doi.org/10.3389/fphys.2018.00909>
- 646 Wagner, M., & Watson, D. G. (2010). Experimental and theoretical advances in prosody: A  
647 review. *Language and Cognitive Processes*, *25*(7–9), 905–945.  
648 <https://doi.org/10.1080/01690961003589492>
- 649 Wildgruber, D., Ethofer, T., Grandjean, D., & Kreifelts, B. (2009). A cerebral network model of  
650 speech prosody comprehension. *International Journal of Speech-Language Pathology*,  
651 *11*(4), 277–281. <https://doi.org/10.1080/17549500902943043>
- 652 Yang, H., Zhou, Z., Liu, Y., Ruan, Z., Gong, H., Luo, Q., & Lu, Z. (2007). Gender difference in  
653 hemodynamic responses of prefrontal area to emotional stress by near-infrared  
654 spectroscopy. *Behavioural Brain Research*, *178*(1), 172–176.  
655 <https://doi.org/10.1016/j.bbr.2006.11.039>
- 656 Zhang, D., Zhou, Y., & Yuan, J. (2018). Speech Prosodies of Different Emotional Categories  
657 Activate Different Brain Regions in Adult Cortex: An fNIRS Study. *Scientific Reports*,  
658 *8*(1), 218. <https://doi.org/10.1038/s41598-017-18683-2>
- 659
- 660
- 661
